# Supplementary material for: Oxidative stress dependent microRNA-34a activation via PI3Kα reduces the expression of sirtuin-1 and sirtuin-6 in epithelial cells
Source: PubMed Central journal article supplement (PMC5073335; doi:10.1038/srep35871), 2016-10-21
Supplement: srep35871-s1.pdf [file srep35871-s1.pdf]

**Title: Oxidative stress dependent microRNA-34a activation via PI3K $\alpha$  reduces the expression of sirtuin-1 and sirtuin-6 in epithelial cells**

**Authors:** J. R. Baker<sup>1</sup>, C. Vuppusetty<sup>1</sup>, T. Colley<sup>1</sup>, Andriana I Papaioannou<sup>2</sup>, P. Fenwick<sup>1</sup>, Louise Donnelly<sup>1</sup>, K. Ito<sup>1</sup> and P. J. Barnes<sup>1\*</sup>

**Affiliations:**

<sup>1</sup> Airway Disease Section, National Heart and Lung Institute, Imperial College, London SW3 6LY, U.K.

<sup>2</sup> 3<sup>rd</sup> Respiratory Medicine Department, Sismanogleio Hospital, Marousi Athens Greece

\* To whom correspondence should be addressed: [p.j.barnes@imperial.ac.uk](mailto:p.j.barnes@imperial.ac.uk)

The authors have declared that no conflict of interest exists

**Supplementary Materials:**

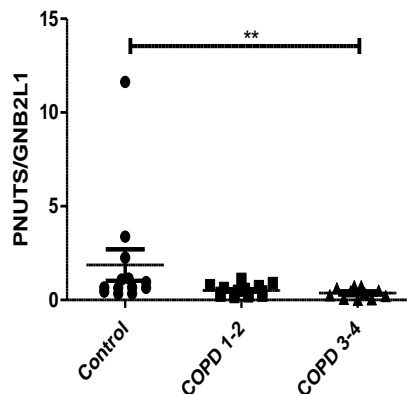

**Supplementary Figure. 1. COPD severity is important in the regulation of PNUTS gene expression** Lung tissue from resections were obtained from 4 healthy volunteers and 9 non-COPD smoker volunteers (Controls), 15 mild COPD G1-2 (Gold 1 plus Gold 2) and 11 severe COPD G3-4 (Gold 3 plus Gold 4) (COPD) and RNA was extracted. PNUTS levels, normalized to GNB2L1, were examine in lung samples from healthy non-smokers, smokers and COPD. Data are means  $\pm$  SEM \*\* P<0.01.

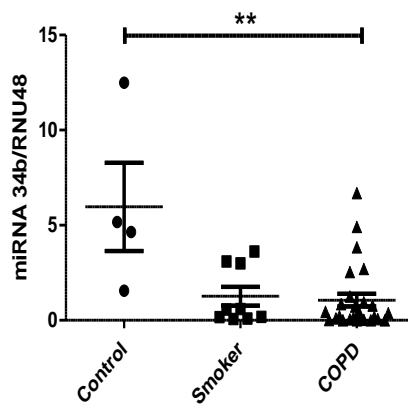

**Supplementary Figure. 2. Smoking may regulate the expression of miRNA 34b** Lung tissue from resections were obtained from 4 healthy volunteers and 9 non-COPD smoker volunteers (Controls), 15 mild COPD (Gold 1 plus Gold 2) and 11 severe COPD (Gold 3 plus Gold 4) (COPD) and RNA was extracted. MiR-34b levels, normalized to RNU48, were examine in lung samples from healthy non-smokers, smokers and COPD. Data are means  $\pm$  SEM \*\* P<0.01.

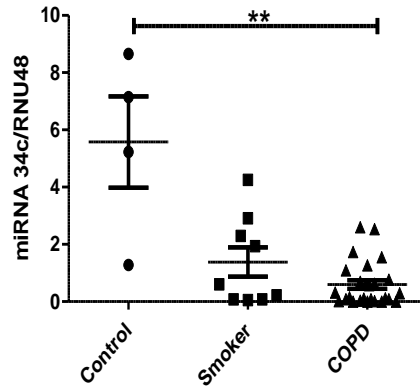

**Supplementary Figure. 3. Smoking may regulate the expression of miRNA 34c** Lung tissue from resections were obtained from 4 healthy volunteers and 9 non-COPD smoker volunteers (Controls), 15 mild COPD (Gold 1 plus Gold 2) and 11 severe COPD (Gold 3 plus Gold 4) (COPD) and RNA was extracted. MiR-34c levels, normalized to RNU48, were examine in lung samples from healthy non-smokers, smokers and COPD. Data are means  $\pm$  SEM \*\* P<0.01.

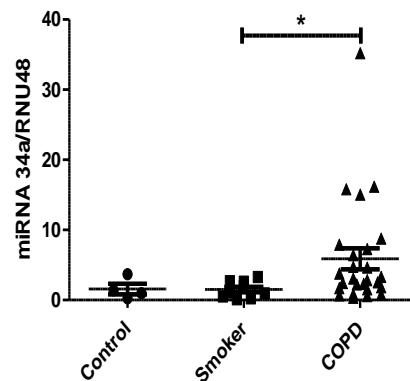

**Supplementary Figure. 4. Smoking appears not to regulate the expression of miRNA 34a** Lung tissue from resections were obtained from 4 healthy volunteers and 9 non-COPD smoker volunteers (Controls), 15 mild COPD (Gold 1 plus Gold 2) and 11 severe COPD (Gold 3 plus Gold 4) (COPD) and RNA was extracted. MiR-34a levels, normalized to RNU48, were examine in lung samples from healthy non-smokers, smokers and COPD. Data are means  $\pm$  SEM \* P<0.05

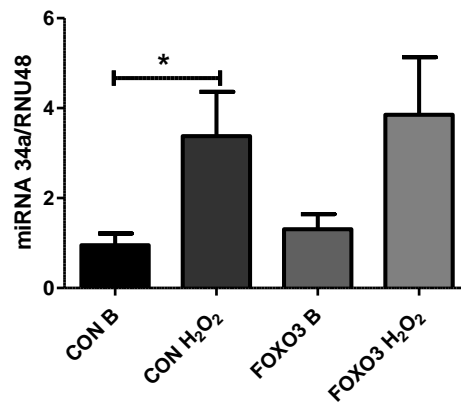

**Supplementary Figure. 5. FOXO3a does not regulate the expression of miRNA 34a**  
BEAS2B cells were transfected with either siRNA against FOXO3a or RNA control and then left untreated for 48 hours. MiR-34a expression was detected by quantitative RT-PCR using commercially available TaqMan primers and normalized to expression of RNU48. Data are means  $\pm$  SEM \*  $P < 0.05$  (n=4).

## Tables

Table 1. The characteristics of study subjects for peripheral lung tissues.

|                       | Non-smoker  | Smokers without COPD | COPD1                     | COPD2                     | COPD3                      | COPD4                      |
|-----------------------|-------------|----------------------|---------------------------|---------------------------|----------------------------|----------------------------|
| Number (M/F)          | 4 (1/3)     | 9 (3/6)              | 7 (5/2)                   | 8 (3/5)                   | 4 (3/1)                    | 7 (3/4)                    |
| Age (yr)              | 70.5±6.1    | 61.7 ± 12.4          | 67.7 ± 6.9                | 63.0 ± 9.3                | 63.3 ± 29.3                | 59.6 ± 4.5                 |
| Pack-years            | N/A         | 46 ± 32.9            | 44.3 ± 16.8               | 61.2 ± 8.4                | 46.7 ± 21.8                | 40.5 ± 18.8                |
| FEV <sub>1</sub> (L)  | 2.2 ± 0.6   | 2.74 ± 0.65          | 2.74 ± 0.55               | 1.86 ± 0.36               | 1.76 ± 0.75 <sup>#</sup>   | 0.52 ± 0.19 <sup>###</sup> |
| FEV <sub>1</sub> (%)  | 97.4 ± 14.5 | 100.5 ± 15.3         | 89.1 ± 3.8                | 65.3 ± 18.8 <sup>#</sup>  | 48.8 ± 21.4 <sup>###</sup> | 16.5 ± 6.7 <sup>###</sup>  |
| FEV <sub>1</sub> /FVC | 80.4 ± 5.5  | 75.1 ± 4.5           | 64.3 ± 3.8 <sup>###</sup> | 61.2 ± 8.4 <sup>###</sup> | 49.5 ± 21.8 <sup>###</sup> | 27.7 ± 10.9 <sup>###</sup> |

COPD patients were categorized by GOLD severity.

Abbreviations: COPD = chronic obstructive pulmonary disease; pack-year = {number of cigarettes smoked per day / 20 × duration of smoking; FVC = forced vital capacity; FEV<sub>1</sub> = forced expiratory volume in one second; <sup>#</sup>  $p < 0.05$ , <sup>###</sup>  $p < 0.01$  vs. Non-Smoker. Data are expressed as mean value ± standard deviation.

Table 2. The characteristics of study subjects for sputum samples.

|                       | Non-smoker | Smokers without COPD | COPD1       | COPD2        | COPD3         | COPD4        |
|-----------------------|------------|----------------------|-------------|--------------|---------------|--------------|
| Number (M/F)          | 1(1/0)     | 4 (3/1)              | 2 (2/0)     | 3 (3/0)      | 6 (4/2)       | 2 (2/0)      |
| Age (yr)              | 65         | 65.5 ± 8.2           | 56 ± 7.1    | 72.0 ± 2.8   | 69.7 ± 6.3    | 70.5 ± 12.0  |
| Pack-years            | N/A        | 21.3 ± 8.5           | 50 ± 0      | 101.7 ± 85.5 | 60.3 ± (40.6) | 102.5 ± 45.9 |
| FEV <sub>1</sub> (L)  | 2.3        | 2.59 ± 0.72          | 3.42 ± 0.2  | 1.71 ± 0.24  | 0.97 ± 0.25   | 0.73 ± 0.07  |
| FEV <sub>1</sub> (%)  | 92         | 99.25 ± 23.6         | 92.5 ± 4.95 | 58.7 ± 6.6   | 35.9 ± 3.9    | 23.5 ± 2.1   |
| FEV <sub>1</sub> /FVC | 77         | 82.3 ± 1.8           | 70 ± 4.3    | 45.0 ± 11.3  | 37.4 ± 6.8    | 31 ± 1.41    |

COPD patients were categorized by GOLD severity.

Abbreviations: COPD = chronic obstructive pulmonary disease; pack-year = {number of cigarettes smoked per day / 20 × duration of smoking; FVC = forced vital capacity; FEV<sub>1</sub> = forced expiratory volume in one second Data are expressed as mean value ± standard deviation.

Table 3. The characteristics of study subjects for primary epithelial cells.

| COPD                   |             |
|------------------------|-------------|
| Number (M/F)           | 7 (6/1)     |
| Age (yr)               | 67.3 ± 10.2 |
| Pack-years             | 41.5 ± 16.9 |
| FEV <sub>1</sub> (L)   | 1.85 ± 0.92 |
| FEV <sub>1</sub> (%)   | 71.2 ± 27.9 |
| FEV <sub>1</sub> / FVC | 49.1 ± 13.5 |

COPD patients were categorized by definition of GOLD.

Abbreviations: COPD = chronic obstructive pulmonary disease; pack-year = {number of cigarettes smoked per day / 20 × duration of smoking}; FVC = forced vital capacity; FEV<sub>1</sub> = forced expiratory volume in one second. Data are expressed as mean value ± standard deviation.
